# Supplementary material for: A unique metallic phase of H3S at high-pressure: sulfur in three different local environments
Source: Royal Society of Chemistry journal article supplement (doi:10.1039/c8cp04410d), 2018-01-01
Supplement: c8cp04410d1.pdf [file c8cp04410d1.pdf]

## A unique metallic phase of the H<sub>3</sub>S at high-pressure: Sulfur in three different local environments

Ashok K. Verma\* and P. Modak

High Pressure and Synchrotron Radiation Physics Division, Bhabha Atomic Research Centre,  
Trombay, Mumbai-400085, India

\*Corresponding author: hpps@barc.gov.in

### SUPPLEMENTARY INFORMATION

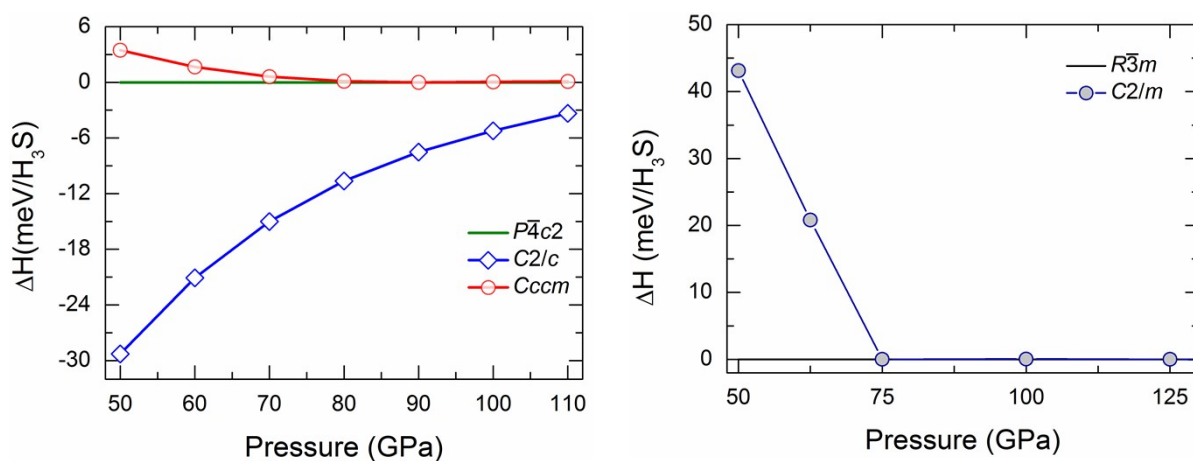

**Figure 1S:** Enthalpies of important structures below 100 GPa for H<sub>3</sub>S.

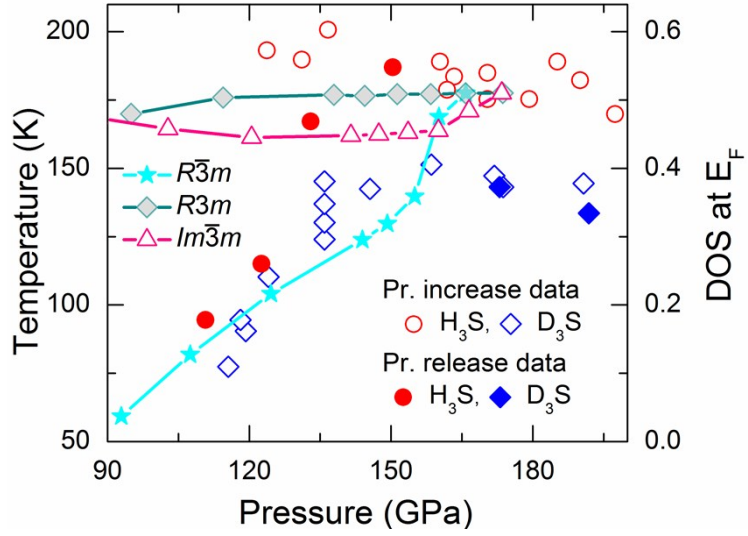

**Figure 2S:** Pressure variation of experimental superconducting temperature<sup>1</sup> and density of states at Fermi-level for  $R3m$ ,  $R\bar{3}m$  and  $Im\bar{3}m$  phases (symbols with connecting lines). Open circles and diamonds show the experimental data taken during pressure increase. Filled circles and diamonds show the experimental data taken during pressure increase and decrease, respectively. Here, DOS is given in units of states/eV/H<sub>3</sub>S.

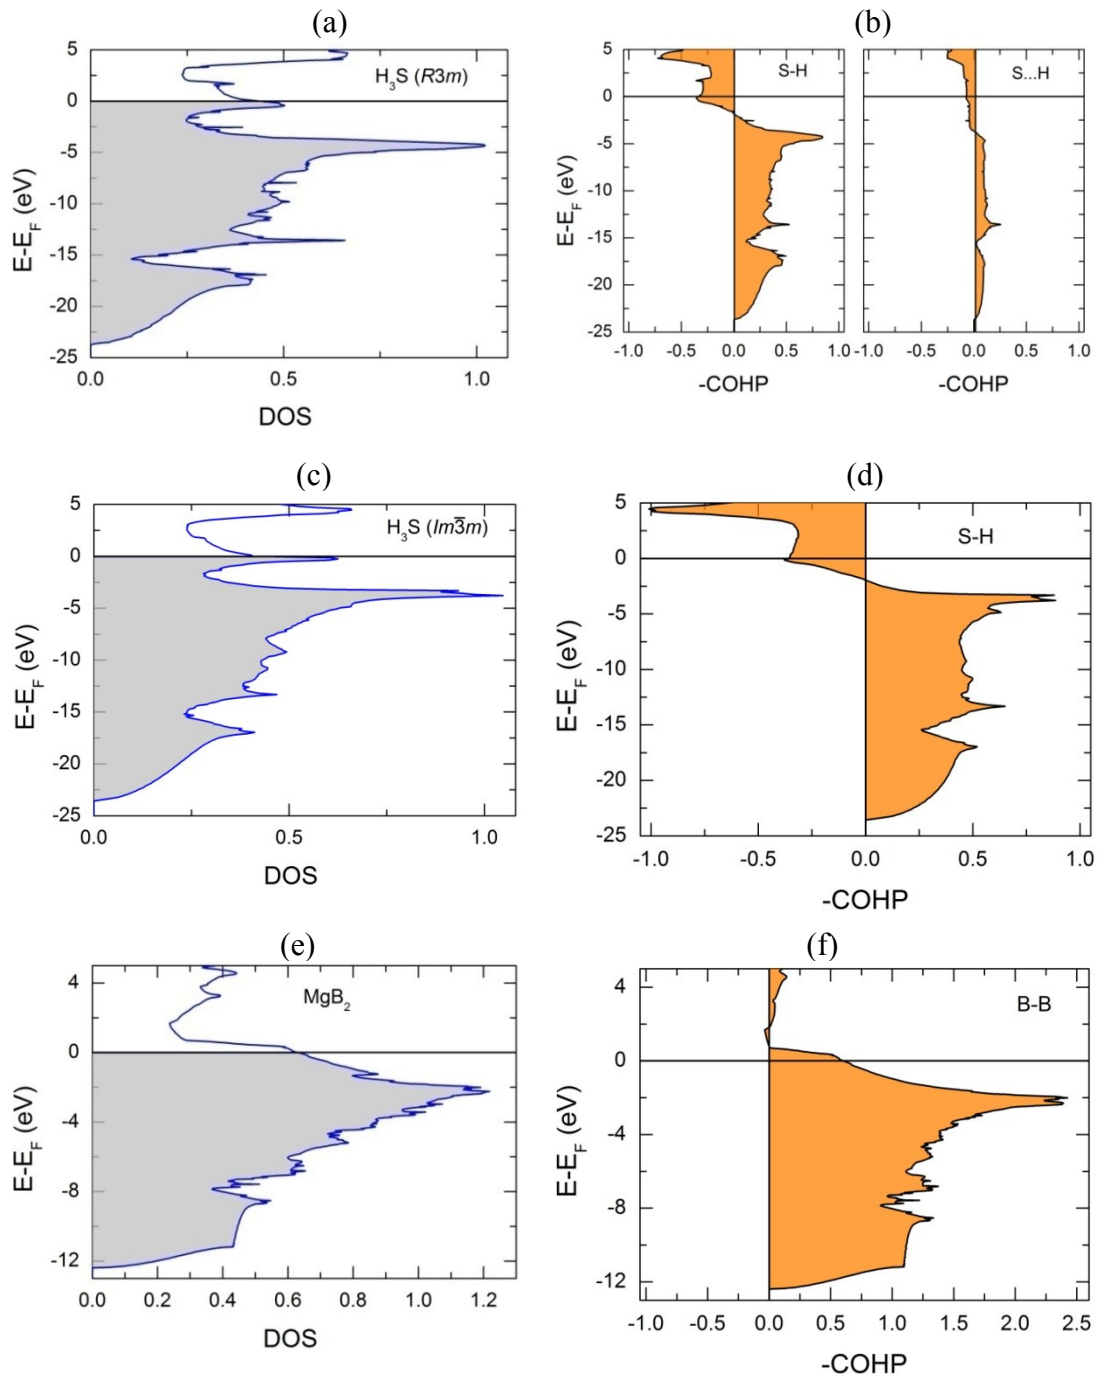

**Figure 3S:** (colour online) The COHP functions along with total DOS functions of H<sub>3</sub>S and MgB<sub>2</sub>. Here H<sub>3</sub>S data is generated at 125 GPa and MgB<sub>2</sub> data is generated using ambient lattice parameters.

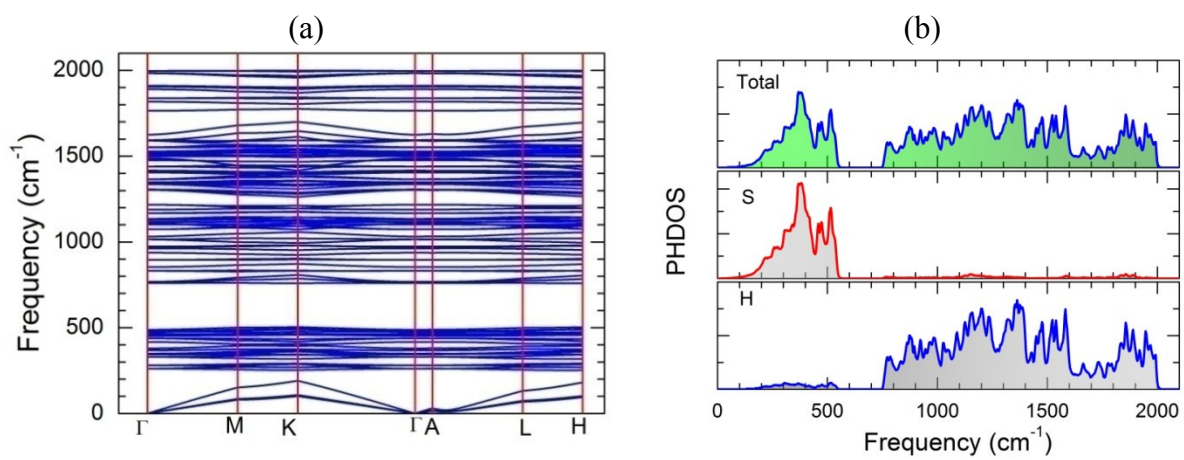

**Figure 4S:** Phonon properties of  $R\bar{3}m$  phase of  $\text{H}_3\text{S}$  at 125 GPa. Here (a) shows the phonon dispersion curve and (b) shows projected phonon density of state functions.

**Table IS:** Crystallographic data of newly proposed H<sub>3</sub>S structures as obtained in GGA calculations. Here pressure (P) is given in GPa unit and lattice parameters in angstrom unit.

|                                                                                                              | <i>P</i> | Lattice parameters                                                       | Atomic coordinates                                                                                                                                                                                                                                                                                                                                                                                                                                                                                                                                            |
|--------------------------------------------------------------------------------------------------------------|----------|--------------------------------------------------------------------------|---------------------------------------------------------------------------------------------------------------------------------------------------------------------------------------------------------------------------------------------------------------------------------------------------------------------------------------------------------------------------------------------------------------------------------------------------------------------------------------------------------------------------------------------------------------|
| <i>R</i> $\bar{3}m$                                                                                          | 125      | $a = 4.3872$<br>$b = 4.3872$<br>$c = 22.1929$                            | H1 (18 <i>h</i> ):0.48383 0.51617 0.06717<br>H2 (18 <i>h</i> ):0.84243 0.15757 0.22697<br>H3 (18 <i>h</i> ):0.17803 0.82197 0.01807<br>H4 (18 <i>h</i> ):0.48373 0.51627 0.19287<br>S1 (6 <i>c</i> ):0.00000 0.00000 0.06330<br>S2 (6 <i>c</i> ):0.00000 0.00000 0.56250<br>S3 (6 <i>c</i> ):0.00000 0.00000 0.68520<br>S4 (6 <i>c</i> ):0.00000 0.00000 0.18960                                                                                                                                                                                              |
| <i>C</i> 2/ <i>m</i><br>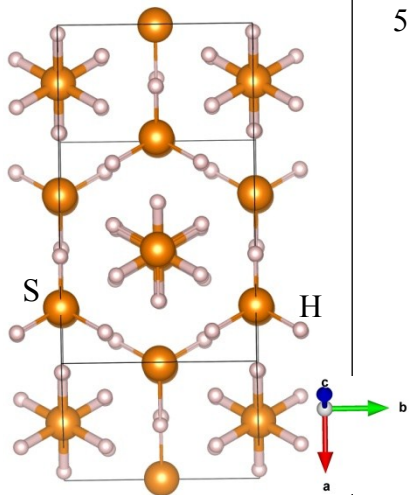  | 50       | $a = 8.3767$<br>$b = 4.7401$<br>$c = 8.6491$<br>$\beta = 110.7890^\circ$ | H1 (4 <i>i</i> ): -0.03653 0.00000 0.78249<br>H2 (4 <i>i</i> ): 0.45848 0.00000 0.28826<br>H3 (4 <i>i</i> ): 0.28088 0.00000 -0.03213<br>H4 (4 <i>i</i> ): 0.82559 0.00000 0.40894<br>H5 (8 <i>j</i> ): -0.06828 0.23621 0.06089<br>H6 (8 <i>j</i> ): 0.46424 0.29001 0.58749<br>H7 (8 <i>j</i> ): 0.32525 0.29089 0.20957<br>H8 (8 <i>j</i> ): 0.79343 0.20718 0.66287<br>S1 (4 <i>i</i> ): 0.44605 0.00000 0.81587<br>S2 (4 <i>i</i> ): -0.06970 0.00000 0.31279<br>S3 (4 <i>i</i> ): 0.83037 0.00000 -0.04902<br>S4 (4 <i>i</i> ): 0.31448 0.00000 0.42830 |
| <i>P</i> $\bar{4}c$ 2<br> | 50       | $a = 5.8703$<br>$b = 5.8703$<br>$c = 4.9157$                             | H1 (4 <i>e</i> ): 0.45517 0.45517 0.25000<br>H2 (8 <i>j</i> ): 0.01639 0.33494 0.26682<br>H3 (8 <i>j</i> ): 0.44999 0.77115 -0.00709<br>H4 (4 <i>g</i> ): 0.00000 0.00000 0.67283<br>S (8 <i>j</i> ): 0.68046 0.83552 -0.00751                                                                                                                                                                                                                                                                                                                                |

## References

1. M. Einaga, M. Sakata, T. Ishikawa, K. Shimizu, M. I. Eremets, A. P. Drozdov, I. A. Troyan, N. Hirao, and Y. Ohish, *Nat. Phys.*, 2016, **12 (9)**, 835.
